# Supplementary material
Source: PubMed Central journal article supplement (PMC2794091)
Supplement: supp_75_24_7682__1.pdf [file supp_75_24_7682__1.pdf]

TABLE S1: Primers used in this study

| Primer # | Sequence 5' – 3'                                                                    | Target/Use                                                                       |
|----------|-------------------------------------------------------------------------------------|----------------------------------------------------------------------------------|
| P1       | GTGAAGGCAAGATGCCATGCATG                                                             | Upstream <i>upp</i> gene                                                         |
| P2       | CCGTCTACTCATCGCGGAGGTGTCAGTAGTACACT<br><b><u>TTAGGCACGTGGTTGTCTCCTTGGACGTGG</u></b> | Upstream <i>upp</i> gene                                                         |
| P3       | CAACCACGTGCCTAAAGTGTACTACTGACACCTCC<br><b><u>GCGATGAGTAGACGGTATCCGCAATGGTGG</u></b> | Dowstream <i>upp</i> gene                                                        |
| P4       | ATTCGGGCGTGACGAAATTGGGCAC                                                           | Dowstream <i>upp</i> gene                                                        |
| P5       | AAACGGAGAAGGTCAGCGTA                                                                | Internal <i>upp</i> gene                                                         |
| P6       | GATGTAGCCGTGTTTCGTTCA                                                               | Internal <i>upp</i> gene                                                         |
| P7       | GGCACTCCATGTGGGAAC                                                                  | Upstream of P1                                                                   |
| P8       | CGAAAAGGGTACGGTCGATA                                                                | Downstream of P4                                                                 |
| P9       | <u>GCGCCATGGCCAGTGTGCCGGTCTCCG</u>                                                  | Kan promoter                                                                     |
| P10      | GACGACGTAAACAGCCACGGTTGTCTCCTCATCCTGT<br><u>CTCTTGATCAGAGC</u>                      | Kan promoter                                                                     |
| P11      | <u>GCTCTGATCAAGAGACAGGATGAGGAGACAACCGTGG</u><br>CTGTTTACGTCGTC                      | <i>upp</i> gene                                                                  |
| P12      | GCCGGCACATTCACGATGCGCCG                                                             | <i>upp</i> gene                                                                  |
| P13      | CAGCAGAAAAAGGCGCTCATGCA                                                             | Upstream of <i>hsdR</i> , Southern probe                                         |
| P14      | GGCAGCATGGCGCATAAGTCGCGACGACTTGTT                                                   | Upstream of <i>hsdR</i> , Southern probe                                         |
| P15      | GCGACTTATGCGCCATGCTGCCAAGCTGGAAGAAA                                                 | Downstream of DVU1702                                                            |
| P16      | GCTGTTCCGTAATGAAGTATCGCCAA                                                          | Downstream of DVU1702                                                            |
| P17      | AAGGAATTCATTGACGGCAAGCCC                                                            | Internal <i>hsdR</i>                                                             |
| P18      | GCTTGGACGCTGTGTTGAACTTGT                                                            | Internal <i>hsdR</i>                                                             |
| P19      | GGATACACAAAGCGGGCTTATCGA                                                            | Screening for <i>hsdR</i> deletion & sequencing of <i>hsdR</i> deletion cassette |
| P20      | GCACGGGTACATGGCATCCATTTA                                                            | Sequencing of <i>hsdR</i> deletion cassette                                      |
| P21      | CCGGTATATGACAGCCAACGAGTGT                                                           | Screening for <i>hsdR</i> deletion & sequencing of <i>hsdR</i> deletion cassette |
| P22      | GTTATGGCTCGTTTGCCGATAGTCA                                                           | Sequencing of <i>hsdR</i> deletion cassette                                      |
| P23      | GCTATGACCATGATTACGCCAAGCTCAG                                                        | Screening inserts in pCR4Blunt-TOPO                                              |
| P24      | ACGGCCAGTGAATTGTAATACGACTCAC                                                        | Screening inserts in pCR4Blunt-TOPO                                              |
| P25      | AACGACGGCCAGTCTTAAGC                                                                | Screening inserts in pCR8/GW/TOPO                                                |
| P26      | AGACACGGGCCAGAGCTG                                                                  | Screening inserts in pCR8/GW/TOPO                                                |
| P27      | GAATTCGACCCAGCTTTCTTGT                                                              | Screening inserts in EcoRV site of pCR8/GW/TOPO                                  |
| P28      | ATTTCTGTCCTGGCTGGTCTAGAGG                                                           | Screening inserts into EcoRV site of pCR8/GW/TOPO                                |

TABLE S1. Continued

| Primer # | Sequence 5' – 3'          | Target/Use                           |
|----------|---------------------------|--------------------------------------|
| P29      | CGGGCAGTGAGCGCAACGCAATT   | Screening for pMO727                 |
| P30      | GCTGAAGCGCATCGTGGACAAGCA  | Screening for pMO727                 |
| P31      | GCGAGCTCCCTCCAGCTTGAG     | DVU3152 (Chromosomal screen)         |
| P32      | GCGAGCTCCGGTGTACATCCCA    | DVU3152 (Chromosomal screen)         |
| P33      | AGAAAGGTAGCCATCTACGGCAAGG | <i>nifH</i> gene (pDV1 screen)       |
| P34      | TCTCAAGTTCTTCGACCTGAAGCG  | <i>nifH</i> gene (pDV1 screen)       |
| P35      | CTCTCTGCAACCTGACGGCG      | <i>fur</i> gene (Chromosomal screen) |
| P36      | ACAGCAGTCTTCACATGCGCTT    | <i>fur</i> gene (Chromosomal screen) |

\*Unique barcode sequence is indicated as:  base pairs

\*\*Kan gene sequence is indicated as:  base pairs

\*\*\*AGGA common between kan promoter and *upp* gene is indicated as:  base pairs

Figure S1.

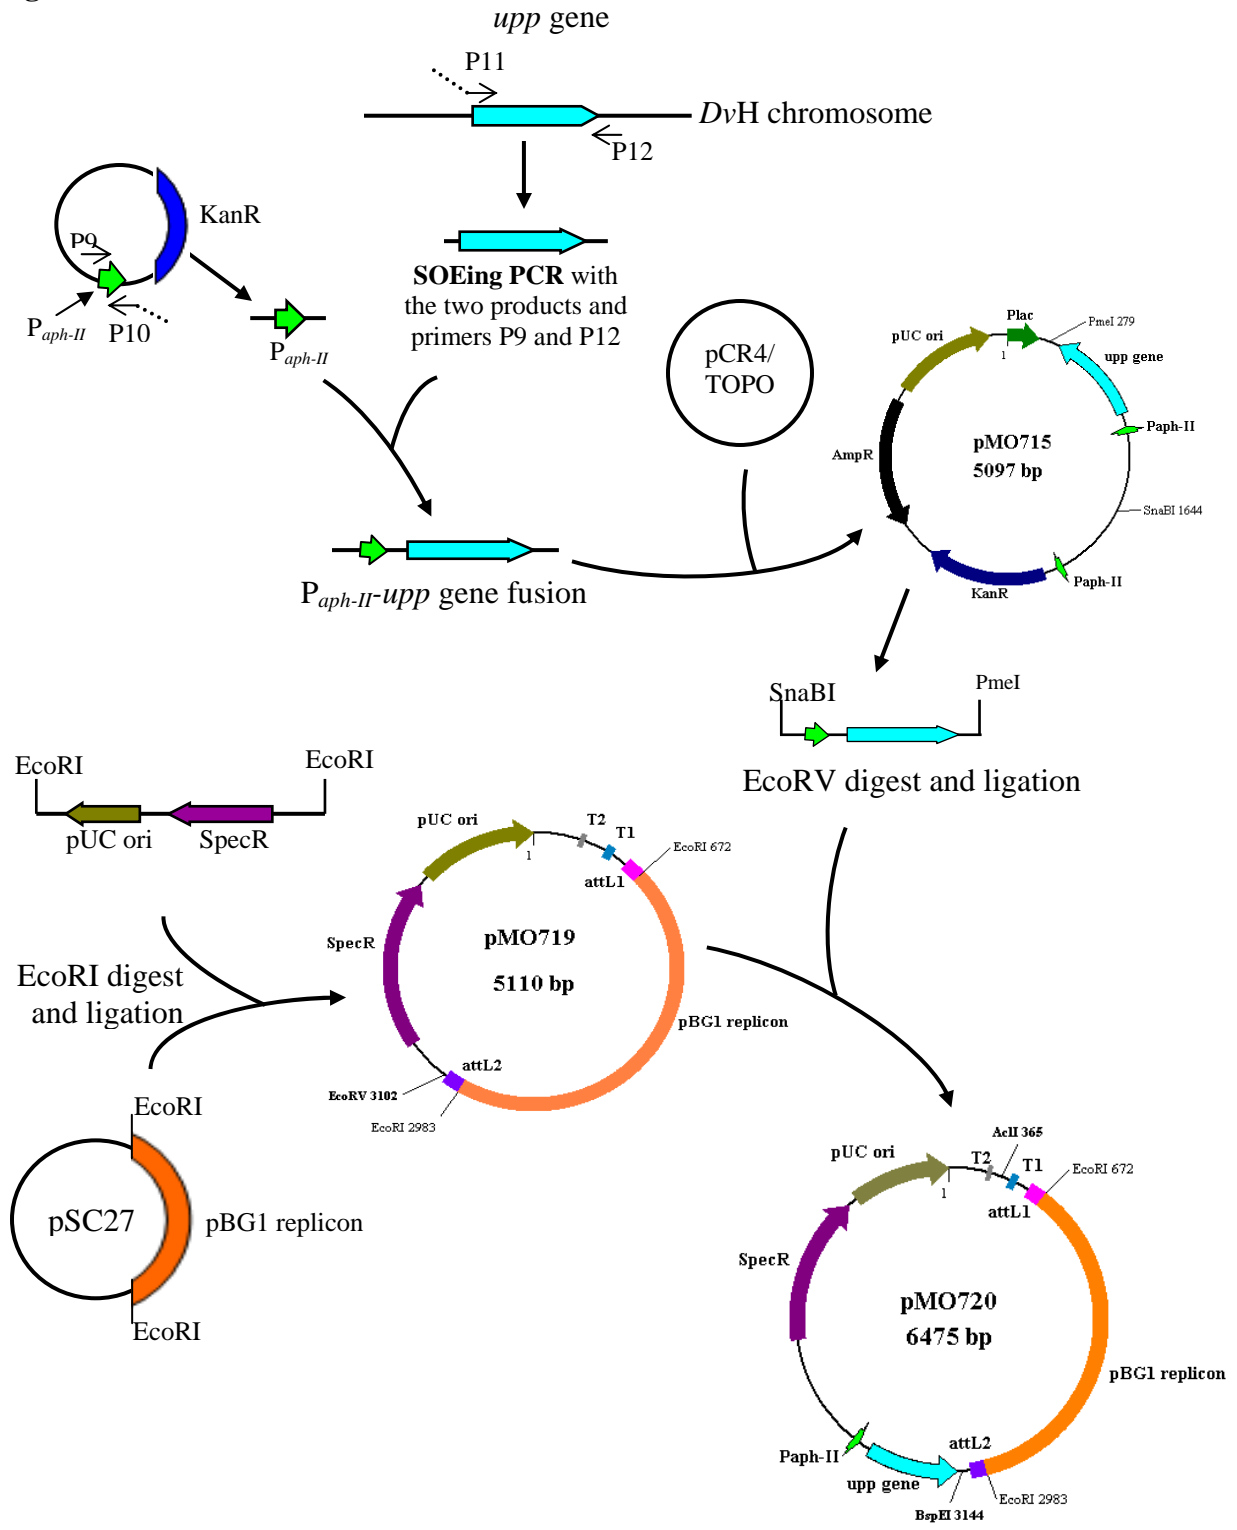

**Figure S1: Construction of pMO715, pMO719, and pMO720.** The *aph-II* promoter (the promoter for the kanamycin resistance gene in Tn5) was fused to the wild-type *upp* gene and captured in the pCR4Blunt-TOPO plasmid, creating pMO715. To construct pMO719, the pBG1 SRB replicon was excised from pSC27 by EcoRI digest. A ligation of the pBG1 replicon fragment with the pCR8/GW/TOPO bounded EcoRI fragment resulted in the generation of the plasmid pMO719. To construct pMO720, the constitutively expressed *upp* gene was excised from pMO715 by a SnaBI/PmeI double digest and then cloned into the EcoRV site of pMO719. (Not drawn to scale)

**Figure S2.**

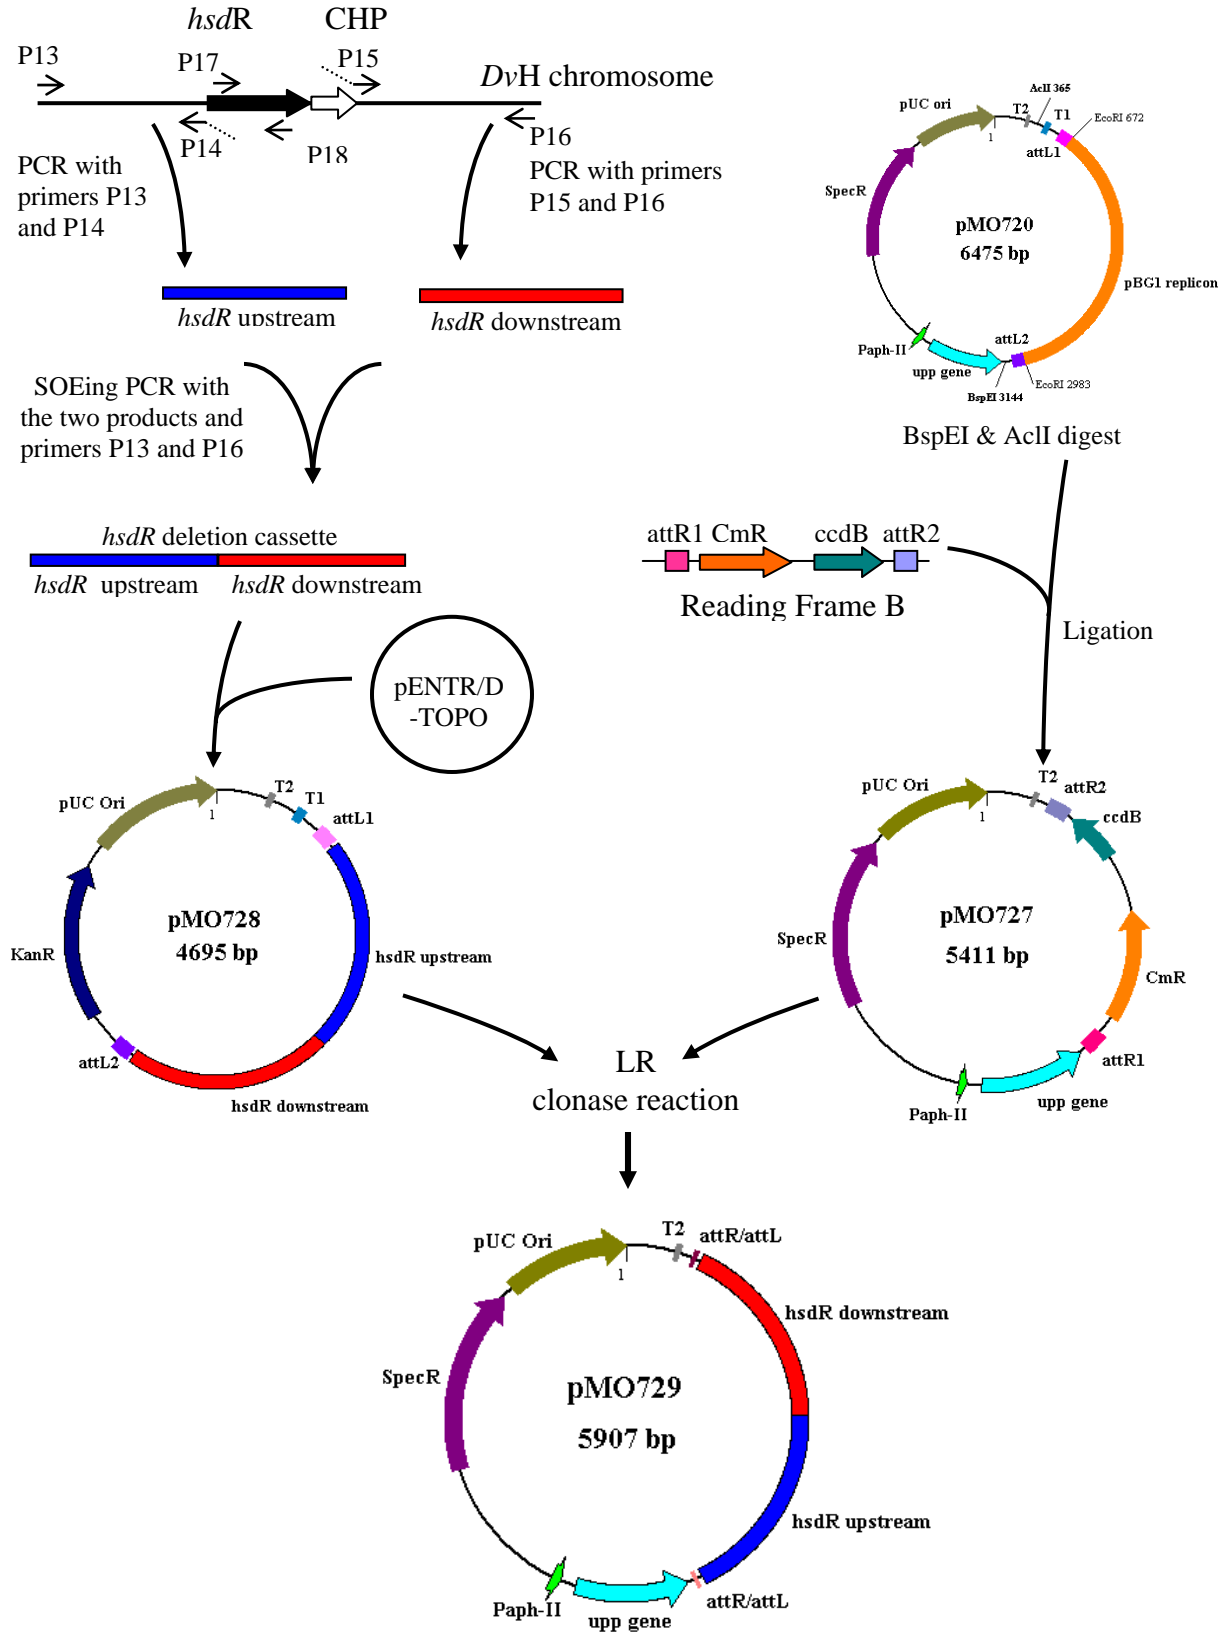

**Figure S2: Construction of the destination vector, pMO727; entry clone for *hsdR*, pMO728; and the mutagenic plasmid for the construction of  $\Delta$ *hsdR*, pMO729.** Reading Frame B from the Gateway® Vector Conversion (Invitrogen) was cloned into pMO720 following the removal of the pBG1 replicon and *attL1/attL2* sites, generating the destination vector, pMO727. A markerless deletion cassette with ~1 kb of the region upstream of *hsdR* was fused to directly to ~1 kb of the region downstream of DVU1702 and cloned into pENTR/D producing the entry vector, pMO728. The markerless deletion suicide vector for the deletion of the *hsdR* was generated by a LR clonase reaction between pMO727 and pMO728, creating pMO729. (Not drawn to scale)

Figure S3.

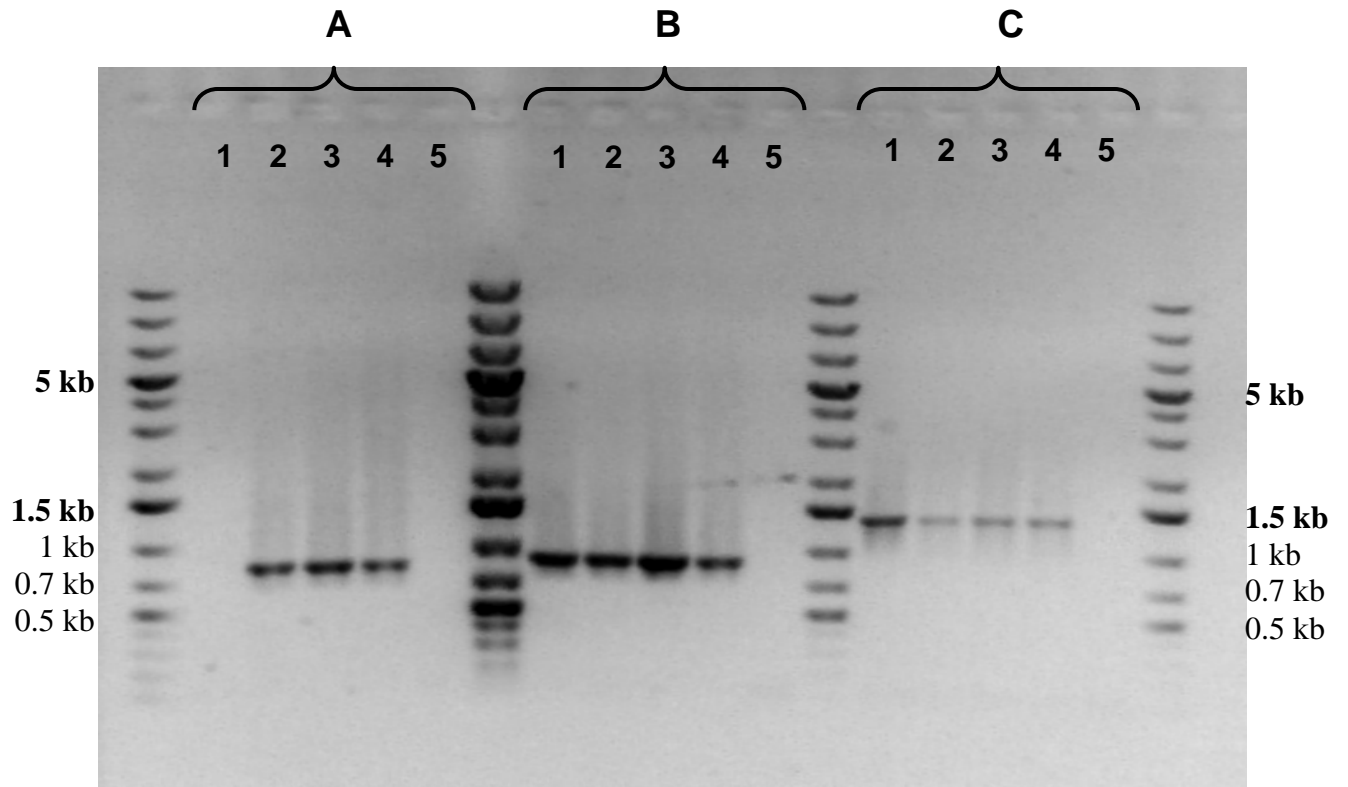

**Figure S3: Determination that the increased transformation efficiency of JW7035 is not due to loss of the native plasmid, pDV1.** Three separate PCR screens were performed, (A) *nifH* gene (DVUA0015) located on native pDV1, 793 bp; (B) histidine kinase gene (DVU3152) located on the chromosome, 868 bp; and (C) *pep* and *fur* genes (DVU0941 and DVU0942, respectively) located on the chromosome, 1241 bp. The template DNAs used were: (1) JW801, (2) *D. vulgaris*, (3) JW710, (4) JW7035, and (5) primers only, no DNA template added. Standards are the GeneRuler™ 1 kb Plus DNA Ladder (Fermentas).
